# Supplementary material
Source: Elsevier journal article supplement (https://www.sciencedirect.com/science/article/pii/S238702061730400X)
Supplement: mmc1 [file S238702061730400X:mmc1.pdf]

Supplementary Table 1: List of adverse effect referred by patients of both treatments groups throughout the study.

|                    | ACT                                                                                                                                                                                                                                                                                                                                                          |
|--------------------|--------------------------------------------------------------------------------------------------------------------------------------------------------------------------------------------------------------------------------------------------------------------------------------------------------------------------------------------------------------|
| Extremity swelling | Dental infection<br>Lumbago<br>Nasopharyngitis<br>Maxillary torus milling<br>Hypercholesterolemia<br>Acute gingivitis<br>Renal colic<br>Lithiasis with septic shock<br>Surgical intervention basal cell carcinoma<br>Hysteroscopic polypectomy<br>Right foot pain<br>Blood hypotension<br>Increased GGT<br>Surgical intervention left carpal tunnel syndrome |
